# Supplementary material
Source: publisher figshare collection journal article supplement (https://frontiersin.figshare.com/ndownloader/files/21928635)
Supplement: Supplementary file [file 21928635]

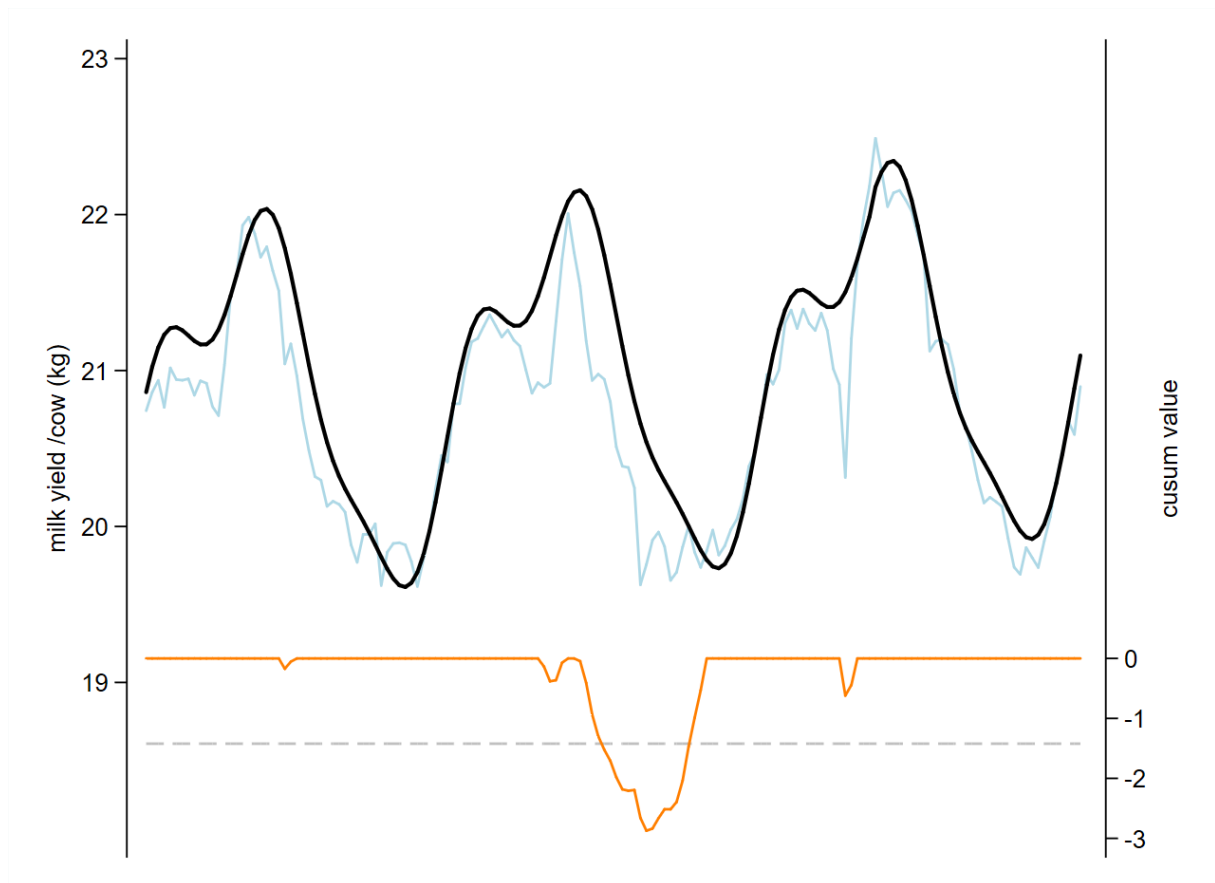

**Supplementary Figure 1.** Graphical example of a Cusum chart for a randomly chosen district, with mean observed milk yield per cow (blue), predicted milk yield per cow (black), the Cusum value (orange) and control limit  $h$  (dashed grey).
